# Supplementary material
Source: publisher site journal article supplement (https://www.dovepress.com/article/600627)
Supplement: Supplementary file 1 [file 600627%20Supplementary%20Material.docx]

# Supplementary Material

Supplementary Figure S1. Exploratory biomarker comparisons by sleep quality and psychological distress categories. Panel A shows log1p-transformed IL-6 according to PSQI category. Panel B shows log1p-transformed IL-8 according to PSQI category. Panel C shows log1p-transformed IL-6 according to HADS-Anxiety category. Panel D shows log1p-transformed IL-8 according to HADS-Depression category. These analyses are exploratory and presented for hypothesis generation.


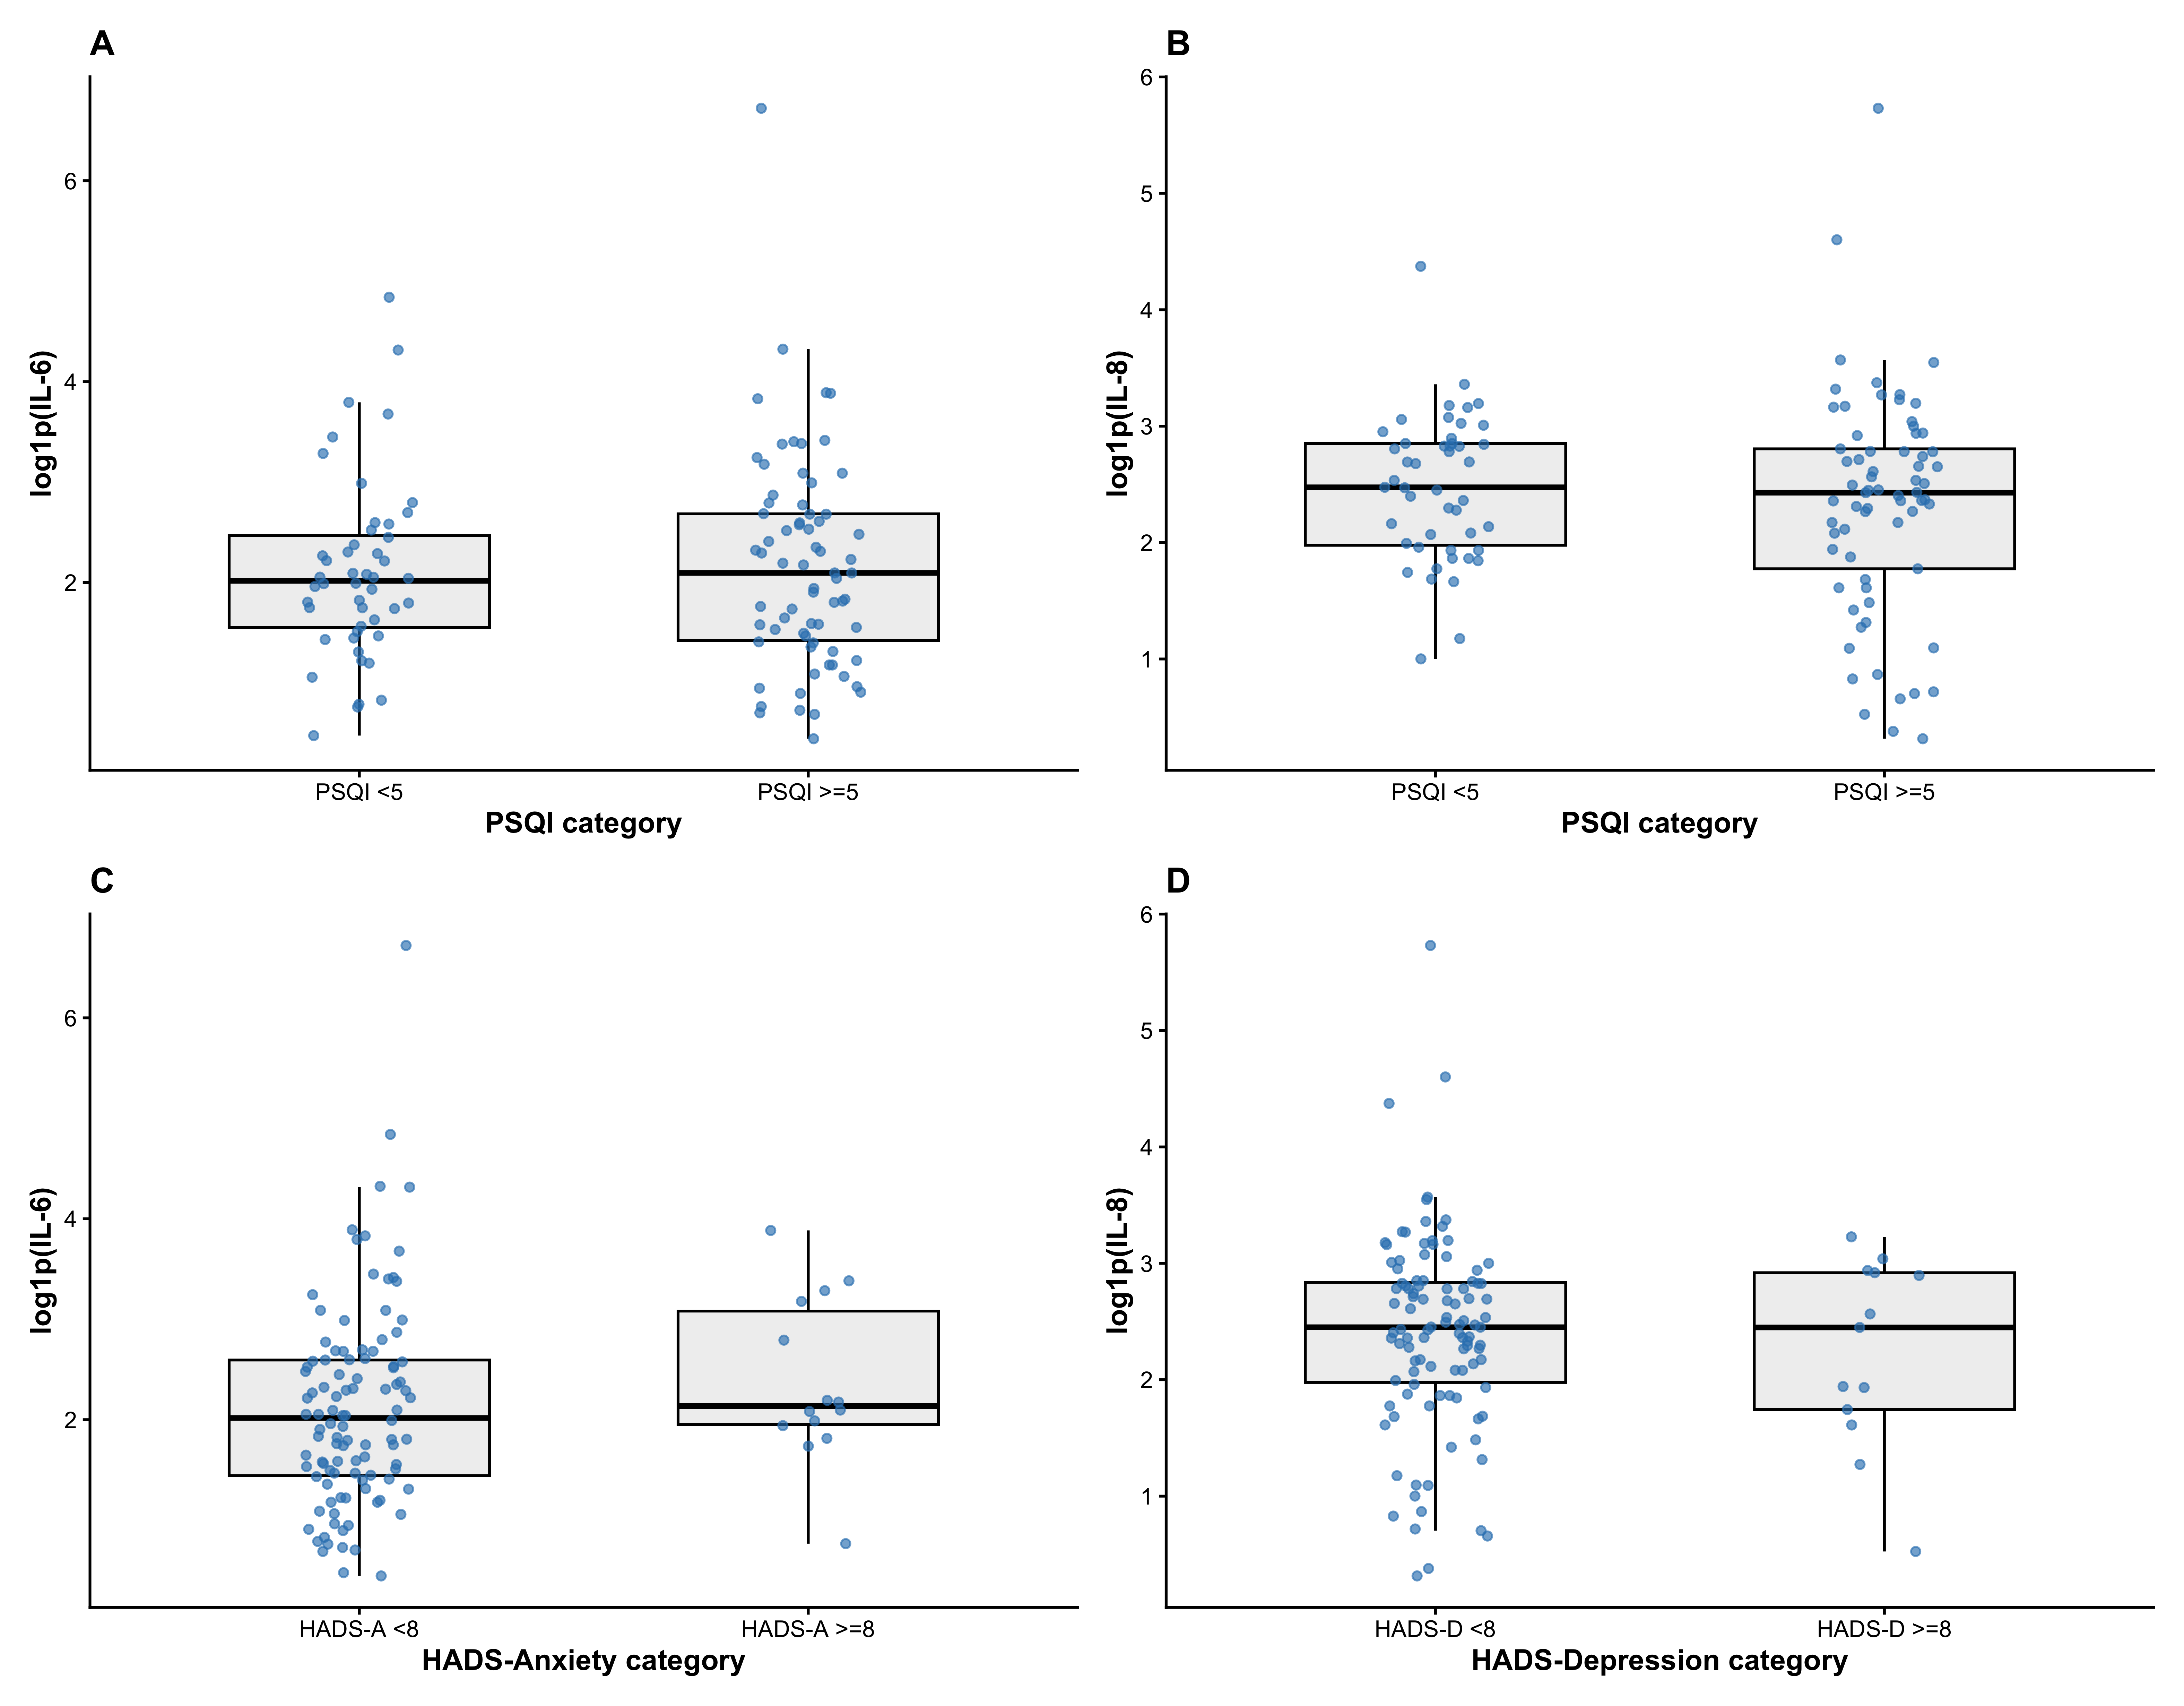


Supplementary Table S1. Multivariable-adjusted logistic regression model for ORR.

| term | OR_CI | P_value |
| --- | --- | --- |
| PSQI_total | 0.62 (0.48-0.75) | <0.001 |
| HADS_A | 1.06 (0.87-1.30) | 0.536 |
| HADS_D | 1.06 (0.89-1.27) | 0.537 |

Supplementary Table S2. Inverse-probability complete-case weighted logistic regression model for ORR.

| term | OR_CI | P_value |
| --- | --- | --- |
| PSQI_total | 0.63 (0.52-0.75) | <0.001 |
| HADS_A | 1.10 (0.90-1.34) | 0.367 |
| HADS_D | 1.01 (0.81-1.25) | 0.943 |

Supplementary Table S3. Complete-case weight model diagnostics, weight distribution, and balance diagnostics.

| Item | Value |
| --- | --- |
| Total screened records | 223.0 |
| Complete-case records | 129.0 |
| Complete-case records with estimated weights | 124.0 |
| Records used in complete-case probability model | 206.0 |
| Raw weight minimum | 1.0 |
| Raw weight median | 1.392 |
| Raw weight maximum | 6.029 |
| Complete-case model C statistic | 0.794 |
| Complete-case model Brier score | 0.179 |
| Complete-case model calibration intercept | -0.0 |
| Complete-case model calibration slope | 1.0 |
| Complete-case model Hosmer-Lemeshow statistic | 13.329 |
| Complete-case model Hosmer-Lemeshow p value | 0.101 |
| Truncation lower percentile | 1.005 |
| Truncation upper percentile | 5.601 |
| Truncated weight minimum | 1.005 |
| Truncated weight median | 1.392 |
| Truncated weight maximum | 5.601 |
| Effective sample size after truncated weighting | 100.8 |

Balance diagnostics for complete-case weighting.

| Variable | Level | Unweighted_SMD | Weighted_SMD |
| --- | --- | --- | --- |
| Age |  | 0.054 | 0.02 |
| Sex | Male | 0.507 | 0.393 |
| ECOG_PS |  | 0.08 | 0.054 |
| ALBI_Grade | 2A | 0.106 | 0.031 |
| ALBI_Grade | 2B | 0.07 | 0.097 |
| ALBI_Grade | 3 | 0.212 | 0.155 |
| Max_Tumor_Diam |  | 0.123 | 0.118 |
| Tumor_Number | 1 | 0.341 | 0.231 |
| Tumor_Number | 2 | 0.093 | 0.069 |
| Tumor_Number | 3 | 0.155 | 0.133 |
| PVTT | VP1 | 0.041 | 0.024 |
| PVTT | VP2 | 0.231 | 0.098 |
| PVTT | VP3 | 0.194 | 0.155 |
| PVTT | VP4 | 0.216 | 0.124 |

Supplementary Table S4. Missing data distribution and multiple-imputation sensitivity results.

| Variable | Missing_N | Total_N | Missing_Percent |
| --- | --- | --- | --- |
| ORR | 94 | 223 | 42.2 |
| DCR | 94 | 223 | 42.2 |
| PSQI_total | 94 | 223 | 42.2 |
| HADS_A | 94 | 223 | 42.2 |
| HADS_D | 94 | 223 | 42.2 |
| Age | 0 | 223 | 0.0 |
| Sex | 0 | 223 | 0.0 |
| ECOG_PS | 0 | 223 | 0.0 |
| ALBI_Grade | 8 | 223 | 3.6 |
| Max_Tumor_Diam | 11 | 223 | 4.9 |
| Tumor_Number | 6 | 223 | 2.7 |
| PVTT | 0 | 223 | 0.0 |
| c6_hypnotics | 94 | 223 | 42.2 |

| term | OR_CI | P_value |
| --- | --- | --- |
| PSQI_total | 0.66 (0.55-0.79) | <0.001 |
| HADS_A | 1.05 (0.88-1.25) | 0.590 |
| HADS_D | 1.04 (0.87-1.25) | 0.631 |

Supplementary Table S5. Multivariable-adjusted DCR sensitivity analysis using continuous PSQI and HADS scores.

| Variable | OR_CI | P_value |
| --- | --- | --- |
| PSQI total score | 0.60 (0.47-0.77) | <0.001 |
| HADS-Anxiety score | 1.26 (0.93-1.71) | 0.130 |
| HADS-Depression score | 0.95 (0.73-1.24) | 0.733 |

Supplementary Table S6. Multivariable-adjusted DCR sensitivity analysis using categorical PSQI and HADS thresholds.

| Variable | OR_CI | P_value |
| --- | --- | --- |
| PSQI >=5 | 0.13 (0.02-0.73) | 0.02 |
| HADS-Anxiety >=8 | 1.00 (0.14-7.10) | 0.997 |
| HADS-Depression >=8 | 0.74 (0.10-5.25) | 0.764 |
